# Supplementary material for: Leveraging a disulfidptosis/ferroptosis-based signature to predict the prognosis of lung adenocarcinoma
Source: Springer Nature journal article supplement (doi:10.1186/s12935-023-03125-z), 2023-11-09

A

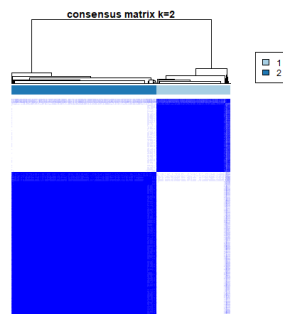

B

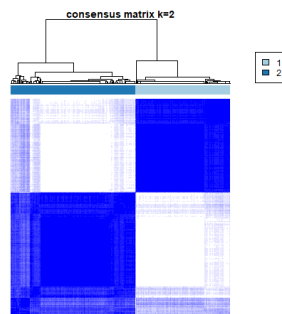

C

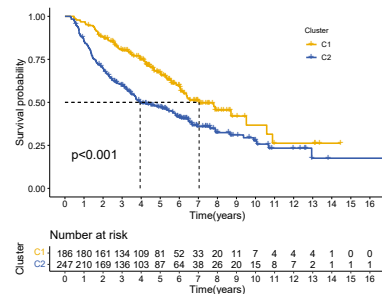

D

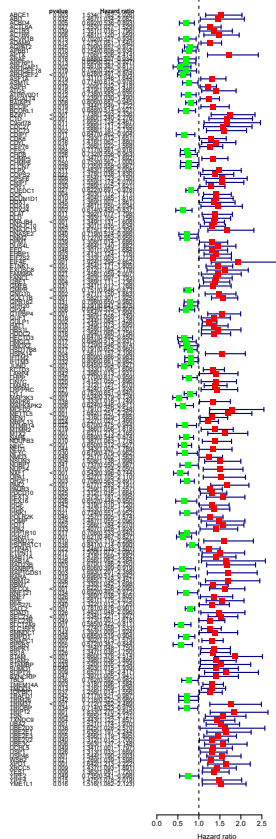

E

|                 | pvalue | Hazard ratio       |
|-----------------|--------|--------------------|
| Gender          | 0.310  | 1.165(0.867~1.565) |
| Age             | <0.001 | 1.033(1.017~1.049) |
| N stage         | <0.001 | 2.086(1.738~2.505) |
| T stage         | <0.001 | 1.847(1.453~2.348) |
| Smoking history | 0.108  | 1.306(0.943~1.809) |
| riskScore       | <0.001 | 3.010(1.884~4.809) |

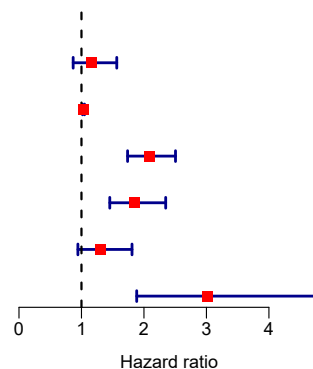

F

|                   | pvalue | Hazard ratio       |
|-------------------|--------|--------------------|
| Gender            | 0.473  | 1.117(0.825~1.513) |
| Age               | <0.001 | 1.039(1.023~1.056) |
| 'N stage'         | <0.001 | 2.096(1.731~2.537) |
| 'T stage'         | 0.004  | 1.430(1.124~1.818) |
| 'Smoking history' | 0.137  | 1.306(0.918~1.858) |
| riskScore         | 0.002  | 2.161(1.337~3.491) |

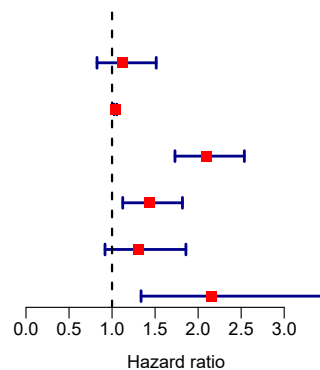

Supplement: MOESM1 [file 26285104]
