# Supplementary material for: Leveraging a disulfidptosis/ferroptosis-based signature to predict the prognosis of lung adenocarcinoma
Source: Springer Nature journal article supplement (doi:10.1186/s12935-023-03125-z), 2023-11-09
Supplement: MOESM2 [file 26285104]

|         | Decision<br>Tree | LASSO    | Random<br>Forest | GBDT     | XGBoost  | AVG      |      |
|---------|------------------|----------|------------------|----------|----------|----------|------|
| STAM    | 0                | 0.193307 | 0.021615         | 0.022395 | 0.015784 | 0.05062  | (1)  |
| MCFD2   | 0.012671         | 0.137993 | 0.016101         | 0.060207 | 0.006438 | 0.046682 | (2)  |
| GMPR    | 0.011103         | 0.114598 | 0.000907         | 0.011962 | 0.014171 | 0.030548 | (3)  |
| MRPL13  | 0.027238         | 0        | 0.036498         | 0.072193 | 0.009307 | 0.029047 | (4)  |
| ARHGEF2 | 0.002588         | 0.073973 | 0.002536         | 0.012569 | 0.004727 | 0.019278 | (5)  |
| APTX    | 0.010659         | 0.065506 | 0.007576         | 0        | 0.011613 | 0.019071 | (6)  |
| SALL2   | 0.012637         | 0.050212 | 0.006            | 0.019072 | 0.004313 | 0.018447 | (7)  |
| TRIM37  | 0.01645          | 0        | 0.01749          | 0.040072 | 0.01764  | 0.01833  | (8)  |
| OR2F1   | 0                | 0.062986 | 0.004299         | 0.01598  | 0.002444 | 0.017142 | (9)  |
| HECTD3  | 0.007159         | 0.053388 | 0.00445          | 0.005475 | 0.011062 | 0.016307 | (10) |
