# Supplementary material for: Leveraging a disulfidptosis/ferroptosis-based signature to predict the prognosis of lung adenocarcinoma
Source: Cancer Cell Int. 2023 Nov 9;23:267. doi: 10.1186/s12935-023-03125-z (PMC10634118; doi:10.1186/s12935-023-03125-z)
Supplement: Supplementary file 4 — Additional file 4. The primer names and corresponding primer sequences. [file 12935_2023_3125_MOESM4_ESM.xlsx]

## Sheet: Sheet1
Primer name	Sequence（5‘-3’）
Homo-GMPR-F	AAGCATTACTCCCTGGATGACTG
Homo-GMPR-R	CACCACGTTCCCTGCCATAAT
Homo-MCFD2-F	CTCGCTCTCCACCTTCAGATATT
Homo-MCFD2-R	TTGGTCGTGCACTGTGTTCTTAT
Homo-SALL2-F	CGCCTCCCTCAATCCCAATATC
Homo-SALL2-R	ACCATTACAGGAGGGTCAGTAGA
Homo-MRPL13-F	AATAGACGCCTTCCCAAGATTGT
Homo-MRPL13-R	GGACTATACCTTCCTGACCTTTCC
